# Supplementary material
Source: PubMed Central journal article supplement (PMC5885857)
Supplement: jamaneurol-75-320-s001.pdf [file jamaneurol-75-320-s001.pdf]

## Supplementary Online Content

Granqvist M, Boremalm M, Poorghobad A, et al. Comparative effectiveness of rituximab and other initial treatment choices for multiple sclerosis. *JAMA Neurol*. Published January 8, 2018. doi:10.1001/jamaneurol.2017.4011

**eTable 1.** Estimated RRMS Incidence in Västerbotten and Stockholm Counties

**eTable 2.** Patient Baseline Characteristics

**eTable 3.** Baseline Characteristics for Västerbotten and Stockholm Counties

**eTable 4.** Reasons for Drug Discontinuation

**eTable 5.** Outcomes Comparisons Adjusted Through Sequential Addition of Baseline Factors

**eTable 6.** Adverse Events Separated After Treatment Group and County

This supplementary material has been provided by the authors to give readers additional information about their work.

**eTable 1.** Estimated RRMS Incidence in Västerbotten and Stockholm Counties

| <b>Population</b>                    | <b>Västerbotten</b> | <b>Stockholm</b> |
|--------------------------------------|---------------------|------------------|
| 2012                                 | 260 217             | 2 127 006        |
| 2013                                 | 261 112             | 2 163 042        |
| 2014                                 | 262 362             | 2 198 044        |
| 2015                                 | 263 378             | 2 231 439        |
| Incident MS cases                    |                     |                  |
| 2012                                 | 17                  | 111              |
| 2013                                 | 19                  | 122              |
| 2014                                 | 12                  | 156              |
| 2015 (10 months)                     | 4                   | 96               |
| MS incidence region<br>(per 100 000) |                     |                  |
| 2012                                 | 6.53                | 5.21             |
| 2013                                 | 7.27                | 5.64             |
| 2014                                 | 4.57                | 7.09             |
| 2015 (10 months)                     | 1.51                | 4.30             |

**eTable 2. Patient Baseline Characteristics**

| Characteristic                         | Treatment group  |                  |                  |                  |                  |
|----------------------------------------|------------------|------------------|------------------|------------------|------------------|
|                                        | RTX, n = 120     | INJ, n = 215     | DMF, n = 86      | FGL, n = 17      | NTZ, n = 50      |
| Age, yr, median (IQR)                  | 37.8 (28.7–48.8) | 35.1 (28.6–43.5) | 33.1 (28.2–39.1) | 31.7 (23.6–39.6) | 29.4 (22.6–35.6) |
| Sex, Male, No [%]                      | 41 [34.2]        | 71 [33.0]        | 24 [27.9]        | 6 [35.3]         | 16 [32.0]        |
| Baseline EDSS, median (IQR)            | 2.0 (1.0–2.5)    | 1.5 (1.0–2.0)    | 1.5 (1.0–2.0)    | 1.8 (1.0–2.5)    | 1.5 (1.0–2.5)    |
| MS duration, mo, median (IQR)          |                  |                  |                  |                  |                  |
| Since debut                            | 15.1 (3.1–53.9)  | 12.2 (4.3–41.2)  | 11.6 (5.1–36.3)  | 4.4 (3.5–23.5)   | 8.9 (2.5–15.7)   |
| Since diagnosis                        | 1.0 (0.3–1.9)    | 1.2 (0.5–2.8)    | 0.9 (0.5–1.5)    | 1.2 (0.6–2.5)    | 1.0 (0.5–1.9)    |
| Relapse 12 mo before treatment, No [%] | 93 [77.5]        | 161 [74.9]       | 160 [74.4]       | 16 [94.0]        | 47 [94.0]        |
| Follow-up time, mo, median (IQR)       |                  |                  |                  |                  |                  |
| Primary outcome                        | 18.8 (12.3–28.0) | 15.3 (8.6–26.3)  | 14.2 (8.6–18.9)  | 12.1 (7.9–22.3)  | 19.0 (11.4–27.5) |
| Secondary outcomes                     | 15.8 (9.5–25.8)  | 14.3 (6.8–24.1)  | 11.3 (7.0–16.1)  | 12.1 (8.6–20.4)  | 16.8 (9.7–25.1)  |
| MRI scans per patient per year         | 1.0 (0.8–1.4)    | 0.9 (0.5–1.5)    | 1.4 (1.0–2.2)    | 1.4 (0.9–2.0)    | 1.2 (1.0–1.8)    |

DMF = dimethyl fumarate; EDSS = Expanded Disability Status Scale; FGL = fingolimod; INJ = interferon beta & glatiramer acetate; IQR = interquartile range; mo = months; NTZ = natalizumab; RTX = rituximab.

**eTable 3.** Baseline Characteristics for Västerbotten and Stockholm Counties

| Characteristic                         | Region               |                    | <i>p</i> |
|----------------------------------------|----------------------|--------------------|----------|
|                                        | Västerbotten, n = 52 | Stockholm, n = 442 |          |
| Age, yr, median (IQR)                  | 29.7 (25.1–39.4)     | 34.7 (28.2–43.6)   | 0.02     |
| Sex, male, No [%]                      | 14 [26.9]            | 144 [32.6]         | 0.44     |
| Baseline EDSS, median (IQR)            | 2 (1-3)              | 1.5 (1-2.5)        | 0.18     |
| MS duration, mo, median (IQR)          |                      |                    |          |
| Since debut                            | 5.1 (2.1–23.3)       | 12.0 (4.1–39.4)    | 0.01     |
| Since diagnosis                        | 0.3 (0.1–0.8)        | 1.2 (0.5–2.2)      | <0.001   |
| Relapse 12 mo before treatment, No [%] | 45 [86.5]            | 340 [76.9]         | 0.16     |
| Follow-up time, mo, median (IQR)       |                      |                    |          |
| Primary outcome                        | 28.2 (16.4–37.9)     | 15.3 (9.2–23.5)    | <0.001   |
| Secondary outcomes                     | 25.2 (13.4–34.9)     | 13.3 (7.7–21.0)    | <0.001   |
| MRI scans per patient per year         | 1.1 (0.9–1.6)        | 1.1 (0.6–1.6)      | 0.26     |

EDSS = Expanded Disability Status Scale; IQR = interquartile range; mo = months; MS = multiple sclerosis

**eTable 4. Reasons for Drug Discontinuation**

|                           | Treatment group |     |     |     |     | County       |           |
|---------------------------|-----------------|-----|-----|-----|-----|--------------|-----------|
|                           | RTX             | INJ | DMF | FGL | NTZ | Västerbotten | Stockholm |
| Disease breakthrough      | 1               | 82  | 14  | 4   | 2   | 3            | 101       |
| Adverse event(s)          | 1               | 60  | 12  | 3   | 2   | 1            | 76        |
| Other                     | 5               | 31  | 6   | 1   | 20  | 5            | 59        |
| Pregnancy                 | 4               | 8   | 2   | 0   | 2   | 1            | 15        |
| JCV+                      | 0               | 0   | 0   | 0   | 16  | 3            | 13        |
| Administration discomfort | 0               | 6   | 0   | 0   | 0   | 0            | 6         |
| Preference                | 0               | 2   | 1   | 0   | 1   | 1            | 3         |
| Disease stabilization     | 1               | 1   | 0   | 0   | 0   | 0            | 2         |
| Other                     | 0               | 1   | 1   | 0   | 1   | 0            | 4         |
| Not stated                | 0               | 13  | 2   | 1   | 0   | 0            | 16        |

DMF = dimethyl fumarate; FGL = fingolimod; INJ = interferons & glatiramer acetate; JCV+ = positive serum test for JC virus; NTZ = natalizumab; RTX = rituximab.

**eTable 5. Outcomes Comparisons Adjusted Through Sequential Addition of Baseline Factors**

|                              | HR (95% CI)                |                      |                      |                      |                     |                     |                      |                     | OR (95% CI)          |                      |                      |                     |
|------------------------------|----------------------------|----------------------|----------------------|----------------------|---------------------|---------------------|----------------------|---------------------|----------------------|----------------------|----------------------|---------------------|
|                              | Discontinuation of therapy |                      |                      |                      | Clinical relapse    |                     |                      |                     | Gd+ lesions          |                      |                      |                     |
|                              | INJ vs<br>RTX              | DMF vs<br>RTX        | FGL vs<br>RTX        | NTZ vs<br>RTX        | INJ vs<br>RTX       | DMF vs<br>RTX       | FGL vs<br>RTX        | NTZ vs<br>RTX       | INJ vs<br>RTX        | DMF vs<br>RTX        | FGL vs<br>RTX        | NTZ vs<br>RTX       |
| Crude                        | 16.0 (7.5<br>– 34.1)       | 14.5 (5.1<br>– 41.4) | 10.3 (3.7<br>– 28.6) | 8.7 (3.7<br>– 20.2)  | 7.1 (3.1<br>– 16.6) | 3.8 (1.3<br>– 11.2) | 5.3 (1.3<br>– 21.4)  | 4.9 (1.8<br>– 13.4) | 10.5 (3.0<br>– 65.8) | 9.1 (2.3<br>– 59.7)  | 3.7 (0.2–<br>40.9)   | 3.8 (0.6<br>– 30.2) |
| + Age, sex                   | 16.6 (7.8<br>– 35.3)       | 13.9 (4.8<br>– 39.9) | 10.4 (3.6<br>– 30.2) | 10.0 (3.9<br>– 25.7) | 7.1 (3.1<br>– 16.4) | 4.0 (1.3<br>– 11.9) | 5.4 (1.3<br>– 22.5)  | 7.0 (2.1<br>– 23.6) | 10.4 (3.0<br>– 65.5) | 8.5 (2.2<br>– 56.4)  | 3.3 (0.1–<br>40.4)   | 3.8 (0.0<br>– 38.8) |
| + EDSS,<br>EDSS <sup>2</sup> | 19.2 (8.4<br>– 44.0)       | 18.3 (5.5<br>– 61.2) | 16.1 (4.3<br>– 60.1) | 9.4 (3.3<br>– 26.3)  | 7.9 (3.3<br>– 18.8) | 4.6 (1.5<br>– 13.8) | 8.7 (1.6<br>– 46.6)  | 6.9 (1.8<br>– 25.9) | 10.0 (2.7<br>– 66.0) | 9.0 (2.2<br>– 60.5)  | 3.4 (0.1–<br>51.7)   | 4.4 (0.1<br>– 45.3) |
| + MS<br>duration             | 19.2 (8.4<br>– 44.0)       | 18.2 (5.4<br>– 61.4) | 12.9 (3.6<br>– 46.8) | 9.1 (3.3<br>– 25.5)  | 7.9 (3.3<br>– 18.9) | 4.8 (1.6<br>– 14.7) | 10.9 (1.8<br>– 64.9) | 6.9 (1.8<br>– 26.0) | 10.0 (2.6<br>– 66.8) | 9.3 (2.3<br>– 64.2)  | 3.7 (0.1–<br>78.8)   | 4.2 (0.1<br>– 40.9) |
| + Relapse yr<br>before start | 19.5 (8.5<br>– 44.6)       | 17.0 (5.0<br>– 57.9) | 11.1 (3.1<br>– 40.1) | 8.7 (3.1<br>– 24.6)  | 7.7 (3.2<br>– 18.6) | 4.7 (1.5<br>– 14.8) | 11.6 (1.9<br>– 73.1) | 7.7 (1.9<br>– 31.1) | 10.3 (2.7<br>– 69.2) | 9.2 (2.2<br>– 63.1)  | 3.3 (0.1–<br>69.6)   | 4.0 (0.1<br>– 38.6) |
| + Region                     | 14.4 (4.9<br>– 42.3)       | 12.4 (3.1<br>– 49.4) | 8.7 (2.0<br>– 38.0)  | 13.9 (3.8<br>– 50.6) | 4.3 (1.6<br>– 11.2) | 3.2 (0.9<br>– 10.6) | 6.0 (0.8<br>– 44.1)  | 5.1 (1.2<br>– 22.2) | 9.0 (1.8<br>– 97.7)  | 9.4 (1.6<br>– 180.8) | 3.1 (0.1<br>– 121.5) | 3.9 (0.0<br>– 54.7) |
| + Follow-up<br>time          | -                          | -                    | -                    | -                    | -                   | -                   | -                    | -                   | 9.3 (2.0<br>– 87.0)  | 8.8 (1.5<br>– 168.2) | 2.7 (0.1<br>– 116.3) | 6.6 (0.1<br>– 94.7) |

DMF = dimethyl fumarate; EDSS = Expanded Disability Status Scale; FGL = fingolimod; Gd+ = gadolinium enhancing MRI scan; HR = hazard ratio; INJ = interferon beta & glatiramer acetate; MS = multiple sclerosis; NTZ = natalizumab; OR = odds ratio; RTX = rituximab.

**eTable 6.** Adverse Events Separated After Treatment Group and County

| Adverse events<br>CTCAE grade, No [%] | Treatment group |            |           |          |           | County       |            |
|---------------------------------------|-----------------|------------|-----------|----------|-----------|--------------|------------|
|                                       | RTX             | INJ        | DMF       | FGL      | NTZ       | Västerbotten | Stockholm  |
| 1                                     | 29 [24.2]       | 131 [60.9] | 65 [75.6] | 5 [29.4] | 12 [24.0] | 6 [11.5]     | 238 [54.1] |
| 2                                     | 12 [10.0]       | 45 [20.9]  | 18 [20.9] | 3 [17.6] | 8 [16.0]  | 2 [3.9]      | 86 [19.6]  |
| 3                                     | 4 [3.3]         | 8 [3.7]    | 1 [1.2]   | 0 [0]    | 3 [6.0]   | 0 [0]        | 16 [3.6]   |
| 4                                     | 0 [0]           | 0 [0]      | 0 [0]     | 0        | 1 [2.0]   | 0 [0]        | 1 [0.2]    |
| 5                                     | 0 [0]           | 0 [0]      | 0 [0]     | 0 [0]    | 0 [0]     | 0 [0]        | 0 [0]      |

DMF = dimethyl fumarate; FGL = fingolimod; INJ = interferon beta & glatiramer acetate; NTZ = natalizumab; RTX = rituximab.
